# Supplementary material
Source: publisher figshare collection journal article supplement (https://sage.figshare.com/ndownloader/files/17059412)
Supplement: Supplementary file 1 [file 17059412]

A note for reviewers: These data were collected at a large, northeastern university in the United States of America. Answers were anonymous and kept confidential. Participants were asked to identify a member of their own social network whom their partner had not met. Respondents were asked, "When you think about your partner meeting this person, what uncertainties, fears, or doubts do you have, if any?" Next, participants were asked to identify a member of their partner's social network whom they had not met. Respondents were asked, "When you think about meeting this person, what uncertainties, fears, or doubts do you have, if any?"

During analysis, data were reviewed an initial time and separated by theme. Those themes are represented in the codebook(s) below. Once separated into themes, codes were reviewed by two individual reviewers. Coders were allowed to assign more than one category to each entry. Responses that had more than one code assigned were unitized, resulting in more expressed uncertainties than there were participants. After coding, the two coders met to compare answers and discuss discrepancies. Any disagreements were settled. Approximately two weeks later, coders met again to review the data in order to make sure a) that all categories were mutually exclusive and b) all categories were exhaustive. The data were then reviewed one final time by the PI to ensure that each response fit into the appropriate category.

**Question 21 (uncertainties associated with people meeting their partner's network member)**

1. Approval– The individual is unsure if the network member in question will accept him/her as a significant other. This perception does not include the thought of the individual actually interacting with their partner's network, as liking is. The category includes concerns for the individual worrying about how the network member's opinion will affect their partner's subsequent evaluations of them, and their relationship.

*"I want this [network member] to think highly of me - family is very important to both my partner and I."*

2. Liking – The individual is concerned that the social network member in question may not invite him/her into their social circle. There is concern for future interaction with not only their partner, but with the network member as well. This includes aspects of 'getting along' and generalizations of the word 'like' and 'dislike'.

*"I'm scared [this network member] won't like me. If they won't like me maybe my partner might lose some amount of interest in me. This is sort of insecurity."*

3. Judging – The category encompasses any insecurities that respondents have. Rather than worrying about the feelings of the network member, it is negative characteristics of themselves that they fear will result in negative outcomes. This category can include liking and approval as they pertain to specific behaviors or characteristics of the respondent.

*"I fear [the network member] would be... reminiscent of my past"*

*"I am really shy when I first meet people, so I'm nervous I won't talk as much as I normally do. I'm also nervous [the network member] won't like me and I'll act different because I'm nervous."*

4. Third party threats to the relationship – The individual is unsure of the intentions of this network member. Respondents are suspicious that this network member might try and 'steal their partner away' from them or seduce them into an act of infidelity. This category can also include non-romantic interests who could be potentially harmful to the relationship simply through interacting with the respondent or their partner.

*"[My partner] might become arrogant around his old best friends"*

*"I don't know how I feel about her being friends with her ex, there was a lot there and it makes me nervous"*

5. None. Reserved for blank answers, illegible responses, or individuals who proclaim that there is no uncertainty at all.

**Question 27 (uncertainties associated with people introducing their partner to their own network)**

1. Approval– The individual is unsure if the network member in question will accept his/her partner as the significant other. This perception does not include the thought of the partner actually interacting with network, as liking is. The category includes concerns for the individual worrying about how the network member's opinion will affect their his/her subsequent evaluations of his/her partner, and their relationship.

*"I fear my family is not as accepting as [my partner's], and they will not like him or see what I do. I already know that from some of the family he has met."*

2. Liking – The individual is concerned that their social network will and partner will not like each other or get along. Concern for future interactions between partner and the network member may be expressed.

*"I fear that they may not get along. They both mean a good deal to me. Even though I don't get to see one of them more often. I fear that they might not like each other."*

3. Jealousy – The respondent is nervous that his/her partner may (irrationally) become jealous of his/her network member due to the relationship that they share. A note for coders: responses should be centered around a perceived threat to the romantic relationship, as opposed to simply being liked or approved of.

*"I just feel like [my partner] won't want me hanging around [my friend] because we used to date. It's not like that but [my partner] won't [sic] see it like that, he just thinks we'll be all over each other when he's not around."*

4. None. Reserved for blank answers, illegible responses, or individuals who proclaim that there is no uncertainty at all.
